# Supplementary material for: Concurrent Bering Sea and Labrador Sea ice melt extremes in March 2023: a confluence of meteorological events aligned with stratosphere–troposphere interactions
Source: Copernicus journal article supplement (doi:10.5194/wcd-5-1473-2024), 2024-12-04
Supplement: Supplementary file 1 [file wcd-5-1473-2024-supplement.pdf]

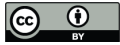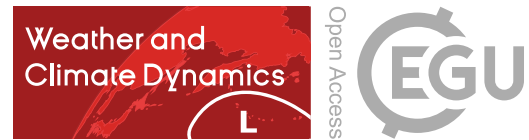

*Supplement of*

## **Concurrent Bering Sea and Labrador Sea ice melt extremes in March 2023: a confluence of meteorological events aligned with stratosphere–troposphere interactions**

**Thomas J. Ballinger et al.**

*Correspondence to:* Thomas J. Ballinger (tjballinger@alaska.edu)

The copyright of individual parts of the supplement might differ from the article licence.

## **1 Introduction**

The supplement consists of four figures (**Figure S1-S5**) that are referenced within, but not central to, the main results presented in our manuscript.

## 2 Supplementary Figures

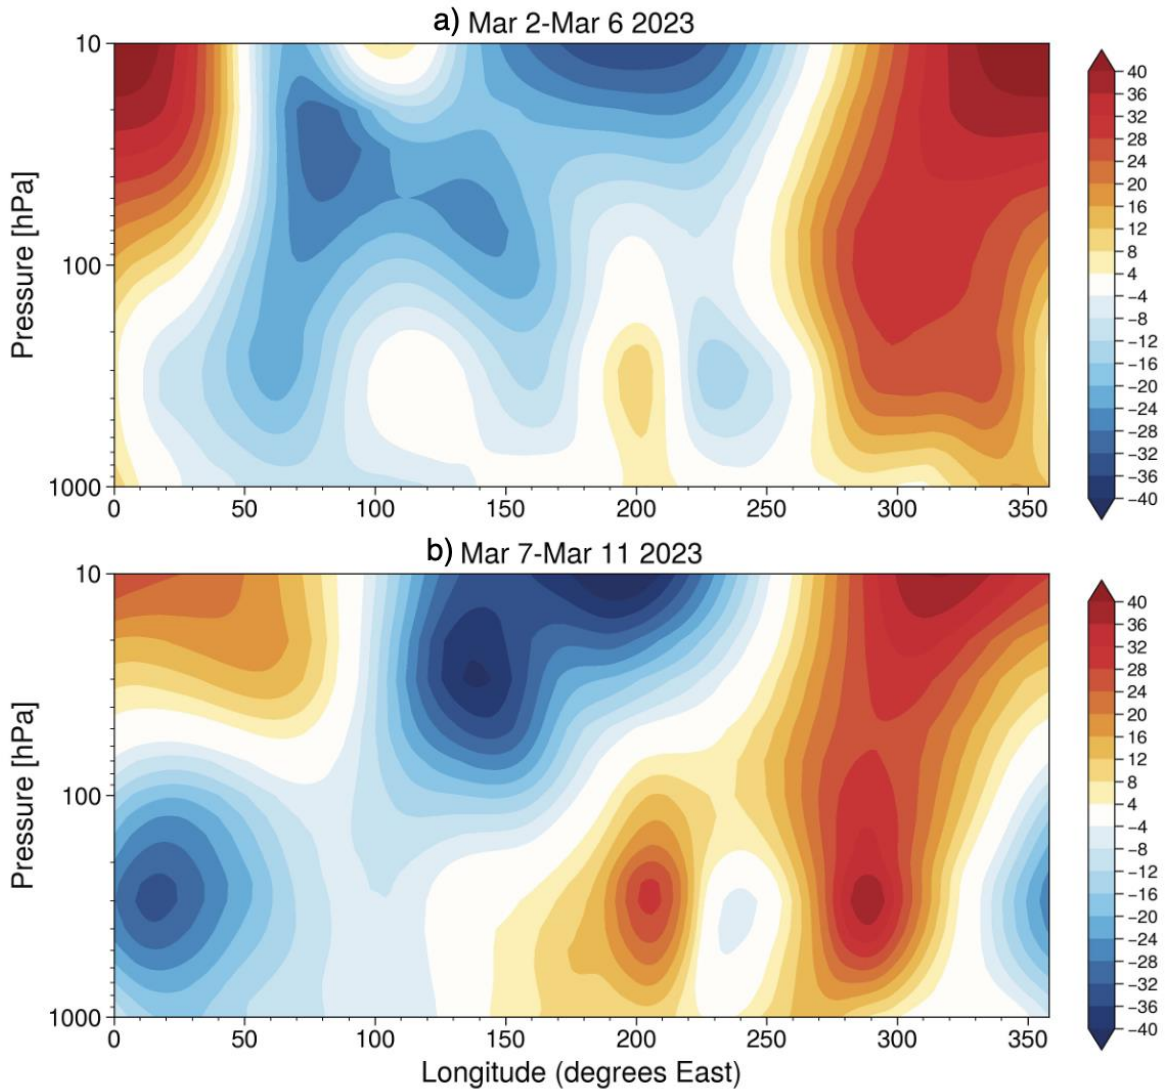

**Figure S1.** The 45-75°N eddy geopotential height anomalies (m) as a function of pressure versus longitude. These anomalies are calculated as the deviation from the zonal-mean for the periods relative to the 1979-2023 climatology for a) March 2-6 and b) March 7-11 2023.

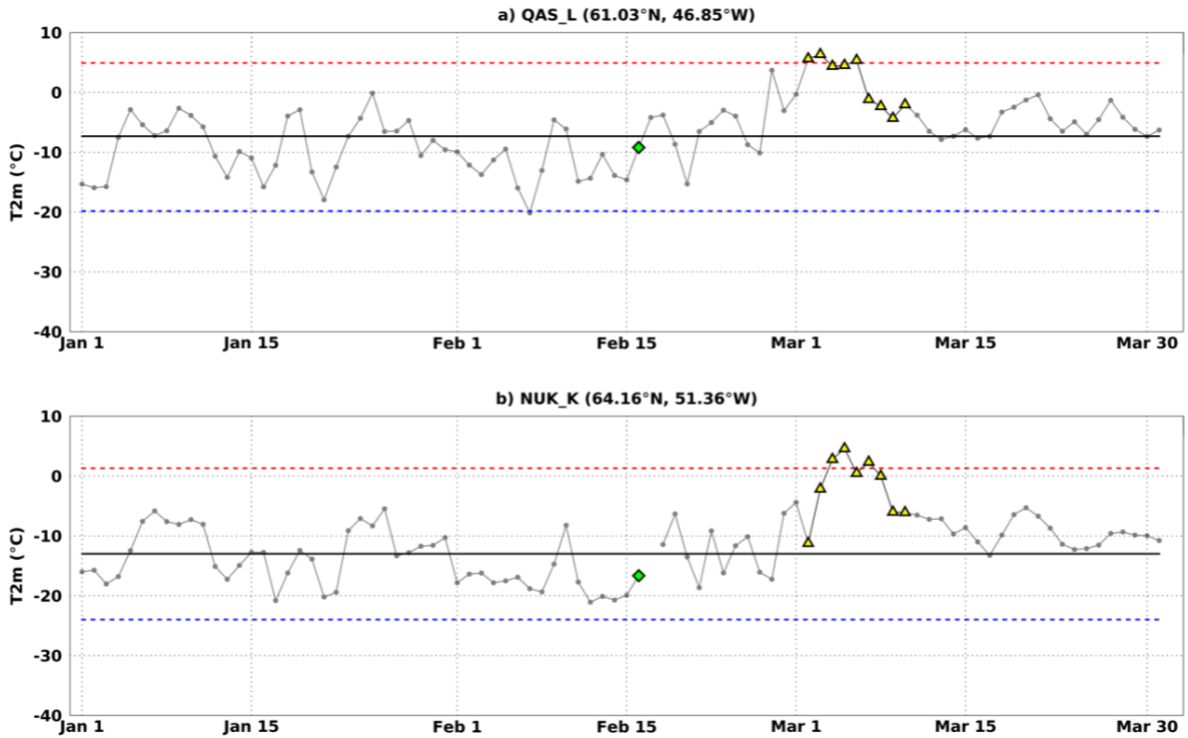

**Figure S2.** GEUS PROMICE weather station two-meter air temperature (T2m; °C) 1 January – 31 March 2023 daily time series (gray lines) overlapping the multi-sectoral melt event for a) QAS\_L and b) NUK\_K. Considering all days from 1 January to 31 March for the respective stations full periods of record (see Section 2.1), the mean T2m (black line), 1<sup>st</sup> percentile (blue dashed line), and 99<sup>th</sup> percentile (red dashed line) are shown in each graphic. The sudden stratospheric warming event on 16 February 2023 is labeled with a green diamond, and to draw attention to the dates around the Labrador Sea and Bering Sea melt events, the period from 2-10 March 2023 is identified by yellow triangles. Missing data (17 February at NUK\_K) are omitted from respective time series. For reference the weather stations are overlaid on **Figure 1**.

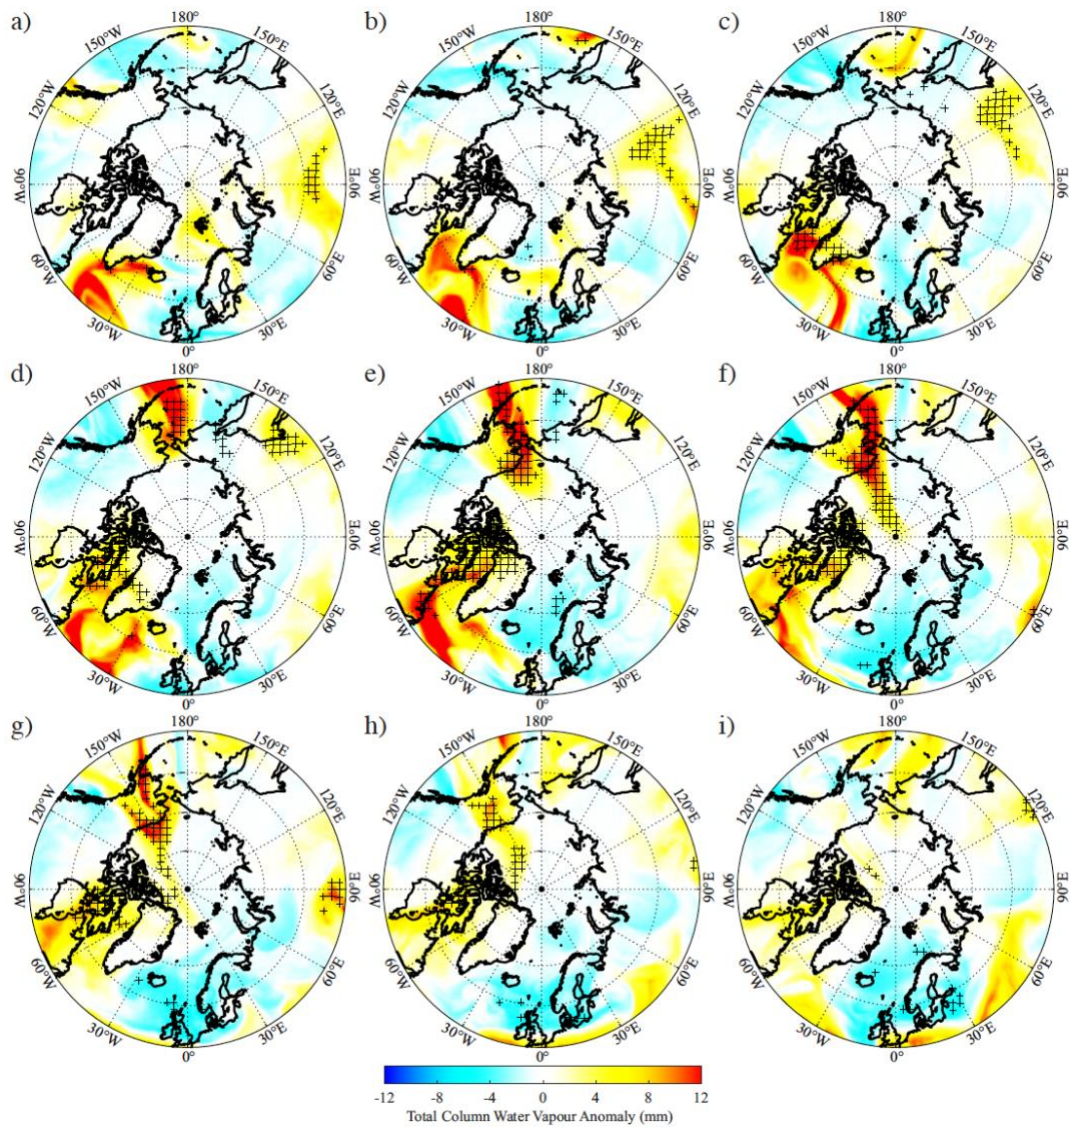

**Figure S3.** Total column water vapor anomaly (mm) from the ERA5 at 0 GMT on: a) 2 March, b) 3 March, c) 4 March, d) 5 March, e) 6 March, f) 7 March, g) 8 March, h) 9 March, and i) 10 March 2023. The anomalies are with respect to the period 16 February – 15 March 1979-2023. Gridpoints where the anomalies are less than the 1st percentile (blue hues) or greater than the 99th percentile (red hues) based on the above period are indicated with the ‘+’.

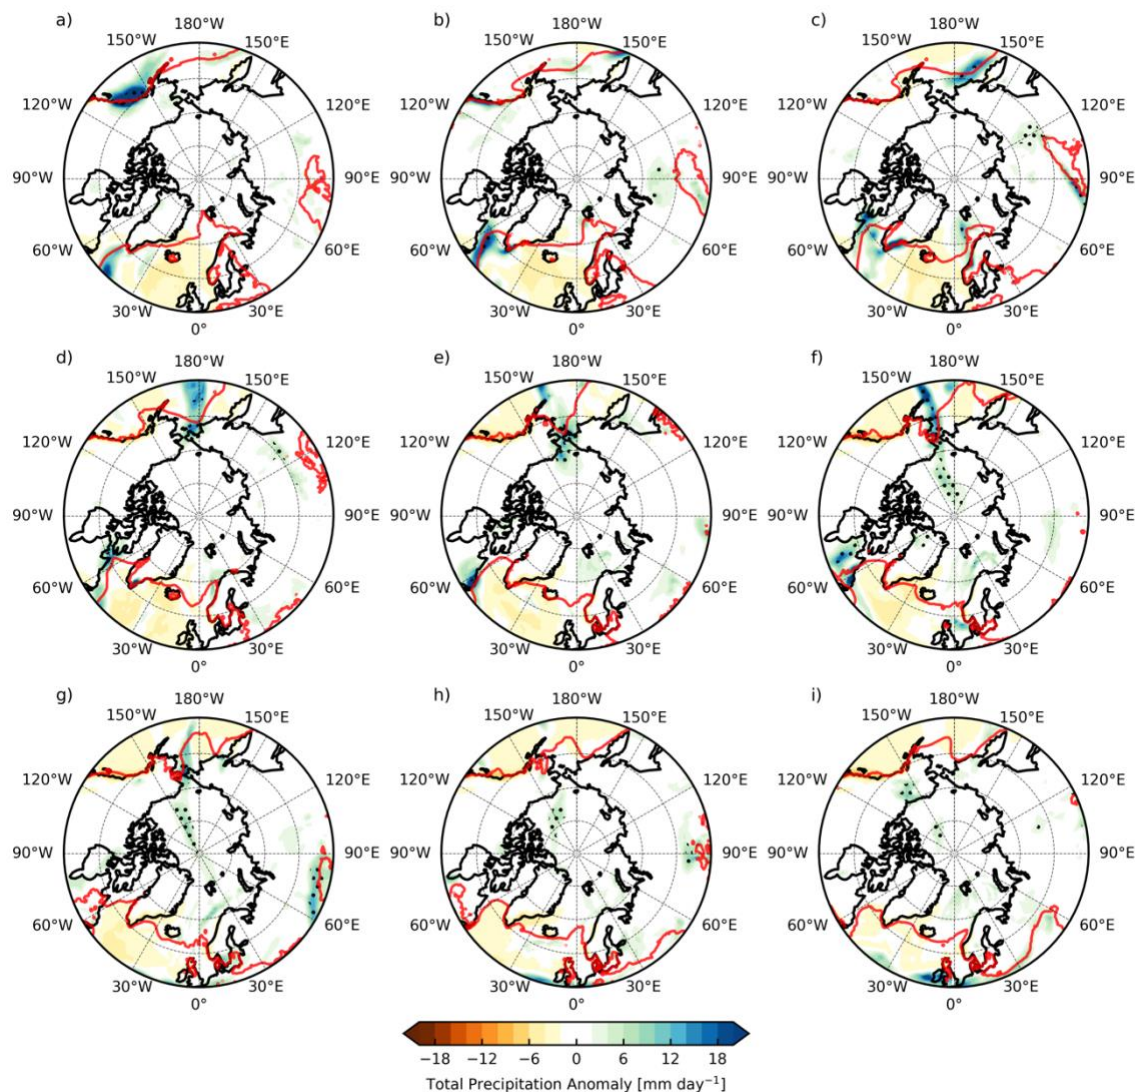

**Figure S4.** Total daily precipitation (mm/day) from the ERA5 for: a) 2 March, b) 3 March, c) 4 March, d) 5 March, e) 6 March, f) 7 March, g) 8 March, h) 9 March, and i) 10 March 2023. The anomalies are shown with respect to the period 16 February – 15 March 1979-2023. Gridpoints where the anomalies are greater than the 99th percentile (blue hues) based on the above period are indicated with the ‘•’. The red curves represent the 0°C isotherm in the two-meter air temperature fields.

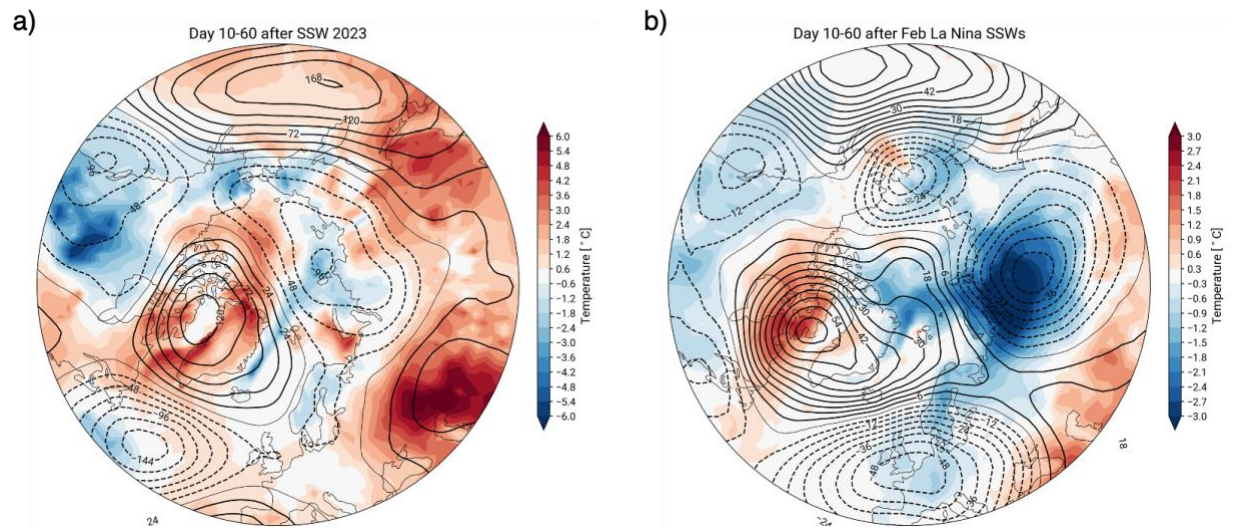

**Figure S5.** a) T2m (shading) and z500 (contours) fields averaged over the 10-60 days following the 2023 SSW event. b) Same as a), but for late January to mid-February SSW onsets that occurred during other La Niña years (1984, 1989, 1999, 2001, 2006, 2008, 2009, and 2018 included). The 10-60 day averaging window is used as the timing of tropospheric response to SSW can vary across events thus requiring a relatively long period to filter out noise.
